# Supplementary material for: Mn-complex modified NaDyF4:Yb@NaLuF4:Yb,Er@polydopamine core–shell nanocomposites for multifunctional imaging-guided photothermal therapy
Source: Royal Society of Chemistry journal article supplement (doi:10.1039/c5tb02785c), 2016-01-01
Supplement: c5tb02785c1.pdf [file c5tb02785c1.pdf]

## Supplementary Information

### **Mn-complex Modified NaDyF<sub>4</sub>:Yb@NaLuF<sub>4</sub>:Yb,Er@Polydopamine Core-shell Nanocomposite for Multifunctional Imaging-guided Photothermal Therapy**

Tianyun Liu<sup>†</sup>, Senzhi Li<sup>†</sup>, Yuxin Liu, Quanwei Guo, Lu Wang, Dongdong Liu, and Jing Zhou<sup>\*</sup>

[\*] Dr. J. Zhou

Department of Chemistry, Capital Normal University

Beijing 100048, China

E-mail: [Jingzhou@cnu.edu.cn](mailto:Jingzhou@cnu.edu.cn)

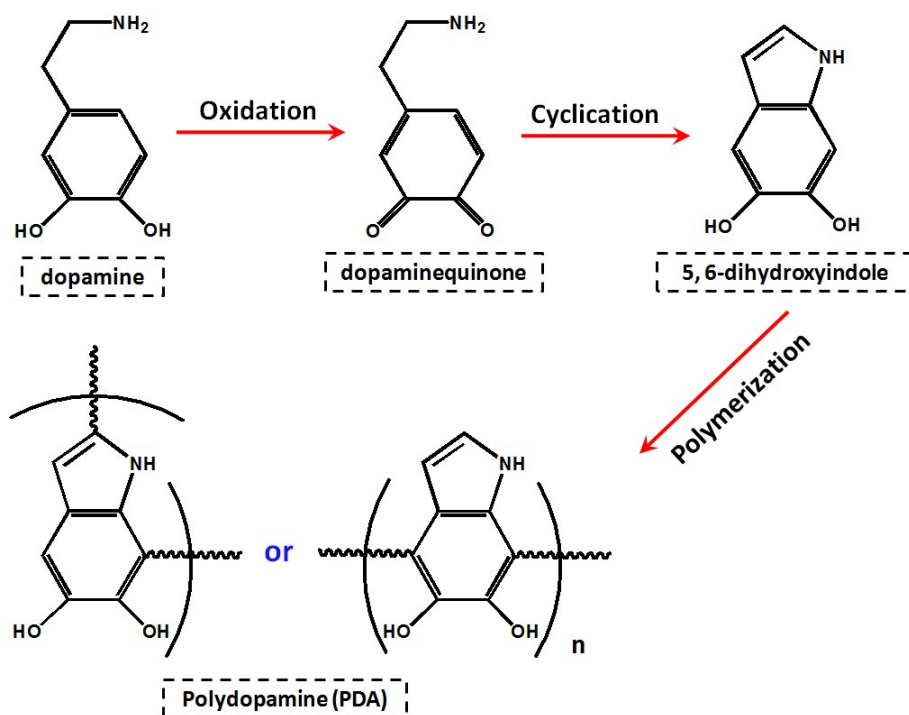

**Figure S1.** The mechanism of the dopamine oxidation, cyclization, and polymerization

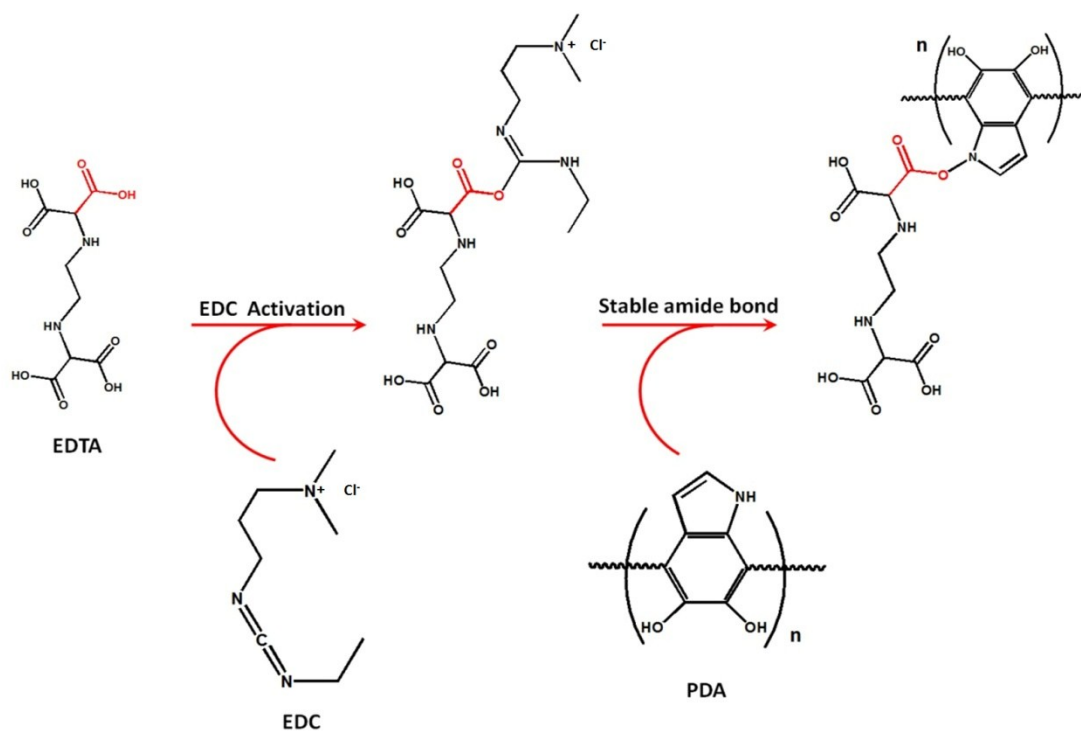

**Figure S2.** The mechanism of the carboxyl activation and EDTA modification

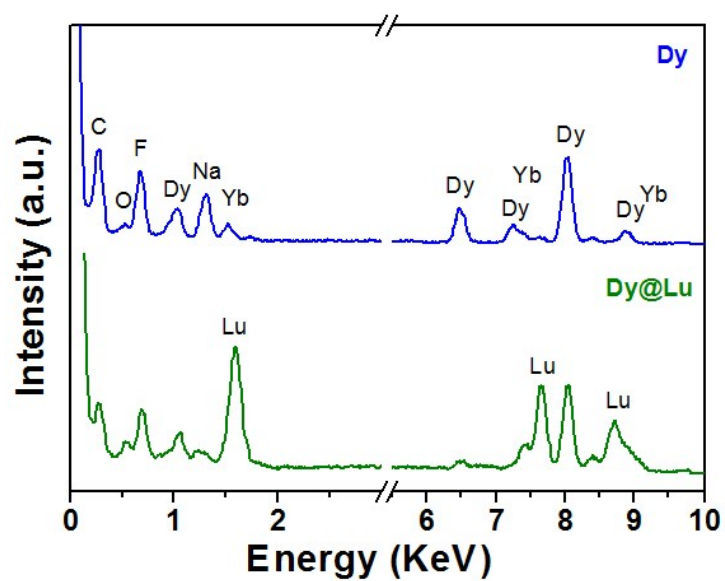

**Figure S3.** Energy-dispersive X-ray analysis (EDAX) spectra of **Dy** and **Dy@Lu**.

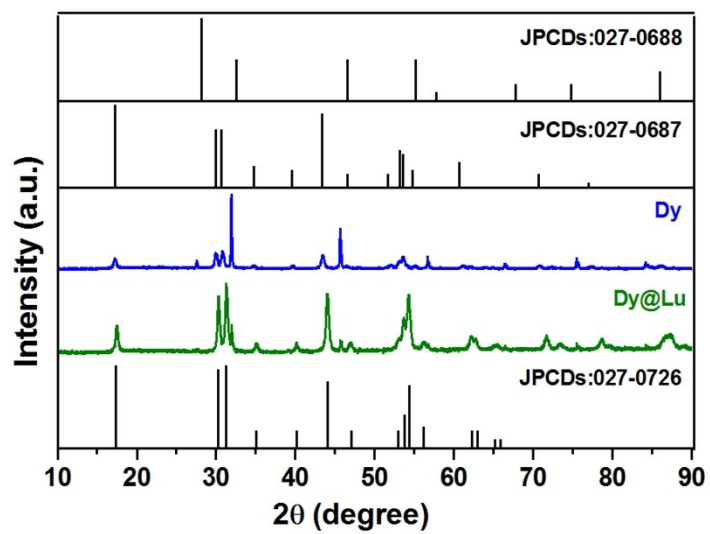

**Figure S4.** XRD patterns of **Dy** and **Dy@Lu**.

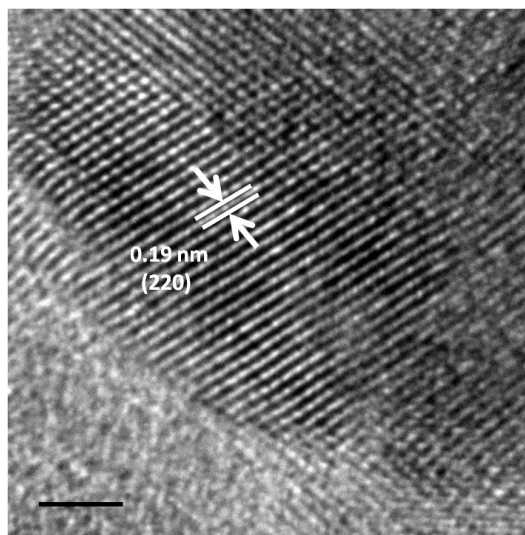

**Figure S5.** The HR-TEM of Dy.

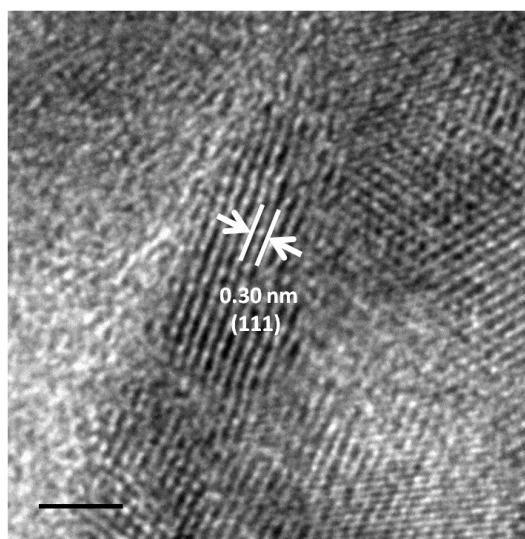

**Figure S6.** The HR-TEM of Dy@Lu.

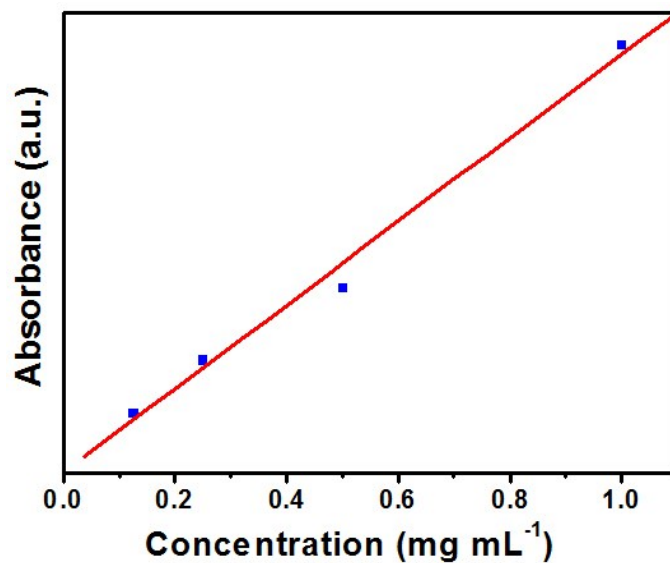

**Figure S7.** Absorbance at 808 nm of **Dy@Lu@PDA-Mn** dispersion in water vs concentration.

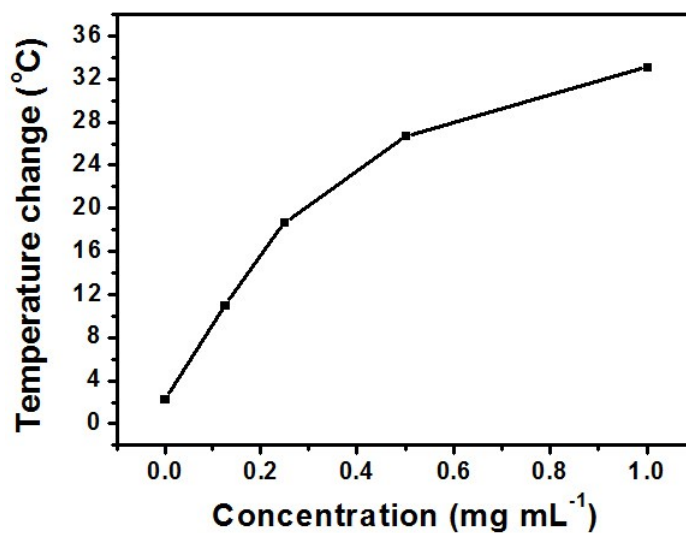

**Figure S8.** Temperature change of **Dy@Lu@PDA-Mn** dispersion in water vs concentration. The result demonstrated that the temperature change was positive related to the concentration of **Dy@Lu@PDA-Mn**

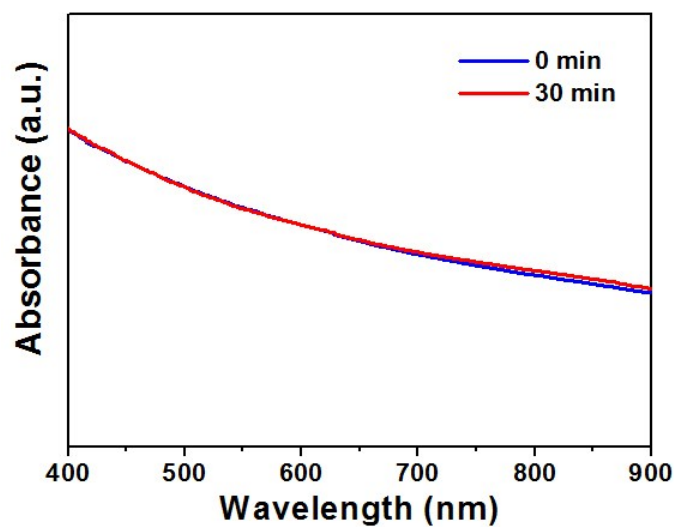

**Figure S9.** UV-vis-NIR absorbance spectra of **Dy@Lu@PDA-Mn** dispersion in water before and after laser irradiation for 30 minutes.

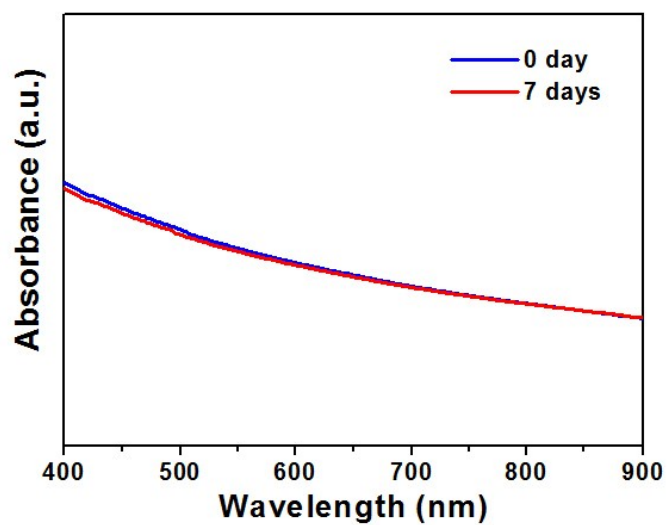

**Figure S10.** UV-vis-NIR absorbance spectra of **Dy@Lu@PDA-Mn** dispersion in water after 7 days standing.
